# Supplementary material
Source: PubMed Central journal article supplement (PMC3167518)
Supplement: 1019386108_pnas.201019386SI.pdf [file 1019386108_pnas.201019386SI.pdf]

# Supporting Information

Gao et al. 10.1073/pnas.1019386108

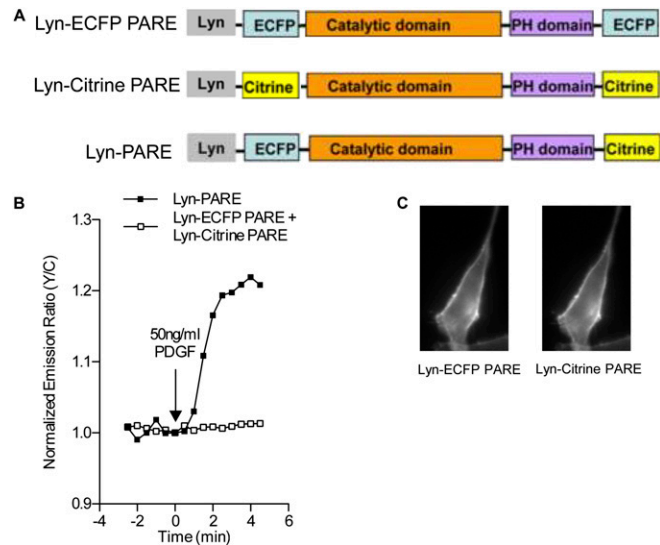

**Fig. S1.** Intermolecular FRET does not contribute to response of Lyn-PARE. (A) Lyn-ECFP PARE and Lyn-Citrine PARE were generated by sandwiching full-length PDK1 between two ECFP proteins and two Citrine proteins, respectively. The constructs were then targeted to membrane rafts by using the targeting motif from Lyn kinase, as described for Lyn-PARE. (B) Representative emission ratio time courses of serum-starved NIH 3T3 cells expressing Lyn-PARE ( $n = 4$ ) or coexpressing Lyn-ECFP PARE and Lyn-Citrine PARE ( $n = 4$ ), stimulated with 50ng/mL PDGF. No response was observed in cells expressing Lyn-ECFP PARE and Lyn-Citrine PARE. This data supports the idea that the response of Lyn-PARE results from a conformational change of PDK1 that occurs upon activation of the kinase rather than a  $PI(3,4,5)P_3$ -induced clustering of the kinase. (C) Representative images of cells coexpressing Lyn-ECFP PARE and Lyn-Citrine PARE.



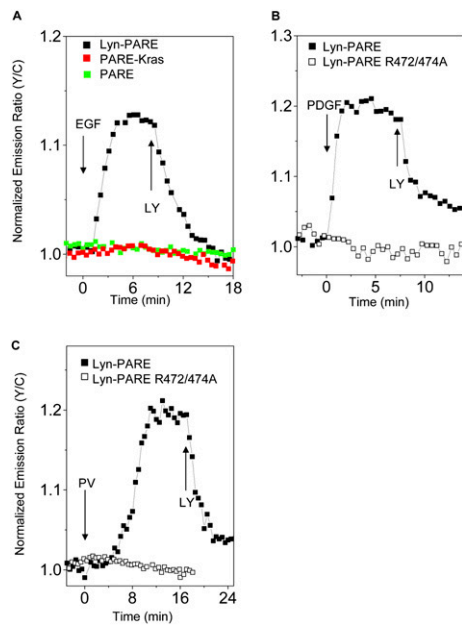

**Fig. 54.** The response of Lyn-PARE depends on 3'-phosphoinositides. (A) Stimulation of serum-starved HeLa cells with 100 ng/mL EGF induced an emission ratio change of Lyn-PARE ( $n = 7$ ), but not PARE ( $n = 4$ ) or PARE-Kras ( $n = 7$ ). Addition of 50  $\mu$ M LY294002 reversed the response of Lyn-PARE ( $n = 7$ ). (B) A representative time course shows the response of Lyn-PARE in serum-starved NIH 3T3 cells stimulated with 50 ng/mL PDGF, followed by 50  $\mu$ M LY294002 addition ( $n = 3$ ). Representative response of the Lyn-PARE (R472/474A) mutant is also shown ( $n = 3$ ). (C) The response of Lyn-PARE to PV depends on 3'-phosphoinositides. A representative time course shows the response of Lyn-PARE to PV in serum-starved NIH 3T3 cells, followed by 50  $\mu$ M LY294002 treatment ( $n = 5$ ). Representative response of the Lyn-PARE (R472/474A) mutant is also shown ( $n = 3$ ).

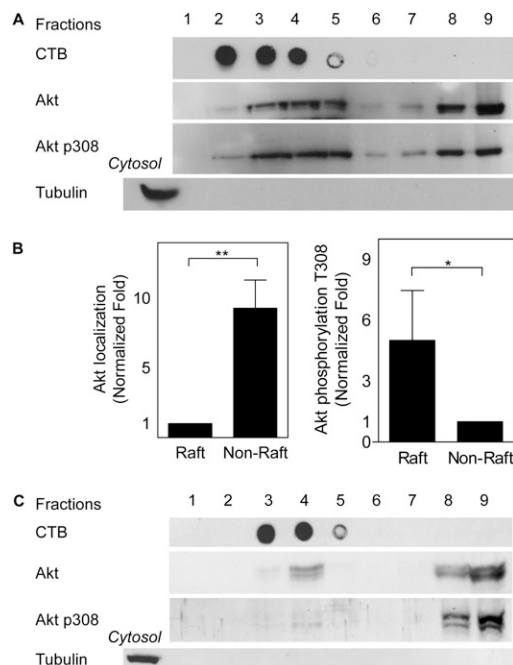

**Fig. 55.** Phosphorylation of Akt by active PDK1 in membrane microdomains. (A) Crude plasma membranes from HEK 293 cells (stimulated with 400 nM insulin) were solubilized and subjected to sucrose density gradient fractionation followed by Western blot analysis using an Akt or phospho-Akt (T308) antibody. Cholera toxin subunit B (CTB) was used as a raft marker. Anti-tubulin was used to ensure the separation of membrane proteins from cytosolic proteins. For fractions 7, 8, and 9, 10 times less volume was loaded. (B) Densitometric analysis of phospho-Akt normalized to total Akt ( $9.3 \pm 2$ -fold stronger signal of total Akt in nonrafts compared with rafts;  $P < 0.01$ ;  $n = 3$ ) showing a  $5.0 \pm 2.5$ -fold ( $P < 0.05$ ;  $n = 3$ ) stronger signal of Akt phosphorylation (T308) in membrane rafts compared with nonrafts, suggesting that PDK1 is preferentially activated in membrane rafts ( $*P < 0.05$ ;  $**P < 0.01$ ). (C) Crude plasma membranes from serum-starved HEK 293 cells were analyzed as in A. Equal sample volume was loaded for each fraction. Some basal Akt phosphorylation (T308) is observed, particularly in the nonraft fractions.



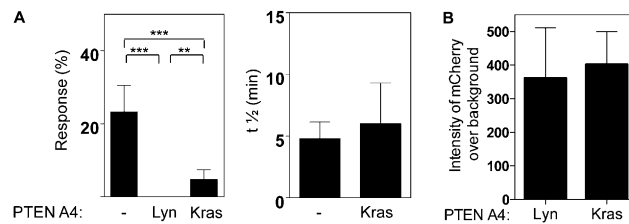

**Fig. 58.** Genetic targeting of PTEN A4 to rafts, but not nonrafts, abolishes Akt activity. (A) PDGF induced responses (amplitude and  $t_{1/2}$  values) of AktAR in the presence or absence of Lyn-PTEN A4 or PTEN A4-Kras (\*\* $P < 0.01$ ; \*\*\* $P < 0.001$ ). (B) Expression levels of Lyn-PTEN A4-mCherry and PTEN A4-mCherry-Kras for experiments analyzed in Fig. 2G.

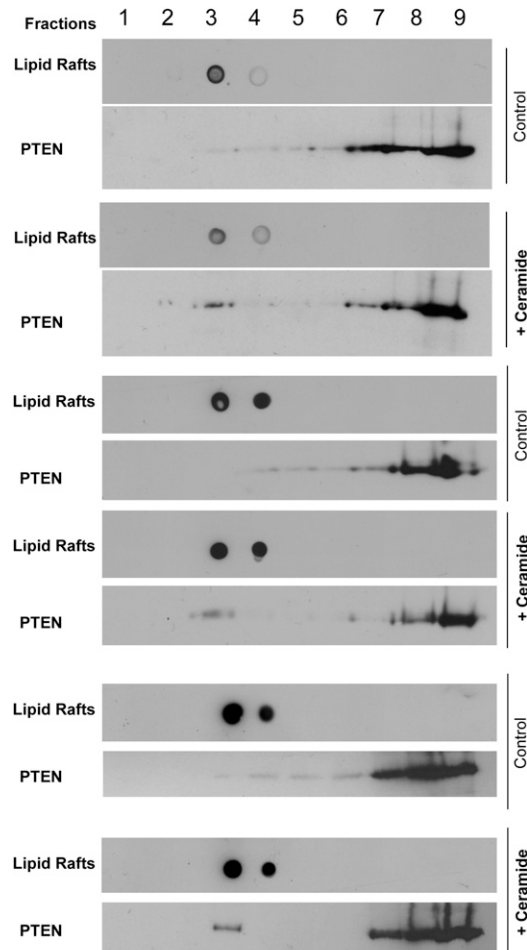

**Fig. 59.** Ceramide recruits PTEN in membrane rafts. Crude plasma membranes from 3T3 L1 adipocytes (in the presence or absence of 50  $\mu\text{M}$   $\text{C}_2$ -ceramide) were solubilized and subjected to sucrose density gradient fractionation, followed by Western blot analysis with PTEN antibody as shown in Fig. 4.

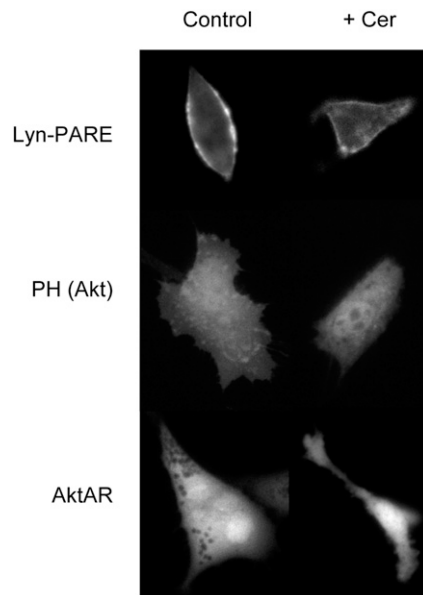

**Fig. S10.** Distribution of Lyn-PARE, Akt PH domain, and AktAR in the presence or absence of ceramide. Yellow fluorescence images show the distribution of Lyn-PARE, Akt PH domain, and AktAR in the presence or absence of 50  $\mu\text{M}$   $\text{C}_2$ -ceramide.

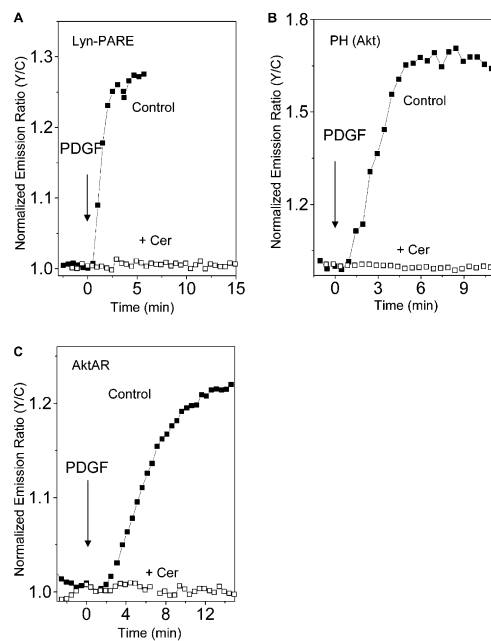

**Fig. S11.** Ceramide suppresses PDK1 activation, membrane recruitment of Akt, and Akt activity in NIH 3T3 cells. (A) Representative time courses showing the response of Lyn-PARE ( $n = 4$ ) in NIH 3T3 cells was abolished with preincubation of 50  $\mu\text{M}$   $\text{C}_2$ -ceramide for 60 min ( $n = 9$ ). (B) Representative time courses showing membrane translocation of Akt PH domain ( $n = 4$ ) in NIH 3T3 cells was abolished with preincubation of 50  $\mu\text{M}$   $\text{C}_2$ -ceramide for 60 min ( $n = 5$ ). (C) Representative time courses showing the response of AktAR ( $n = 4$ ) in NIH 3T3 cells was abolished with preincubation of 50  $\mu\text{M}$   $\text{C}_2$ -ceramide for 60 min ( $n = 3$ ).
